# Supplementary material for: The Genome of Streptococcus mitis B6 - What Is a Commensal?
Source: PubMed Central journal article supplement (PMC2828477; doi:10.1371/journal.pone.0009426), 2010-02-25
Supplement: pone.0009426.s001.pdf [file pone.0009426.s001.pdf]

smi\_0091

(154)

VKDSIDVPAGVLEQAKATGPFAGVVKPLNVELFAGDGMLTRLLKASDKAPWSNDGVAQNEKIPPV.KNL.PDGKYVYQVVSINGNTGKQGDLLDLTRTNGTNTYEATLWYEAAGDKADLTKYVKGRKVNTLNGLVTRSDVNSAVENN  
VKDSIDVPAAYLEKAEKGGPFTAGVNOQVIFYELFAGDGMLTRLLKASDKAPWSNDGVAQNEKIPPV.KNL.PDGKYVYQVVSINGNTGKQGDLLDLTRRANGTQTYKATVYVGNKDKGKADLTNIVATKNVDININGLVAKETVEKAVKDN  
VKDSIDVPAAYLEKAEKGGPFTAGVNOQVIFYELFAGDGMLTRLLKASDKAPWSNDGVAQNEKIPPV.KNL.PDGKYVYQVVSINGNTGKQGDLLDLTRRANGTQTYKATVYVGNKDKGKADLTNIVATKNVDININGLVAKETVEKAVKDN  
VKDSIDVPAAYLEKAEKGGPFTAGVNOQVIFYELFAGDGMLTRLLKASDKAPWSNDGVAQNEKIPPV.KNL.PDGKYVYQVVSINGNTGKQGDLLDLTRRANGTQTYKATVYVGNKDKGKADLTNIVATKNVDININGLVAKETVEKAVKDN

smi\_0345

(1524)

PKLEVEETSTAFERQERPNLTVQORQIVQTVGEQIRRLIEVDSQGNELRLRAREVILKEASPEIVEVGTGLIPAN.PAP.QNTLPLPKFTNQPAYDQQKA  
PKLEVOEKVAFDROEHEHADMLVGEQRILIQGRDGLLRHVFEVDENGQRRLRSDEVIQEAIPETVEIGTKVKTEPAVAPTQEKTAQNTAAK

smi\_0810

(488)

AEEKQTARNAVDAASQAHQNDINAIDKGTGIDTAKNNGLSAIQNVPTTATFYKNTAKQEIATAANA...KKS AIDGQAGLT  
AEEKQTAKNAVDAATQANENIDNATNQAGVDTAKNNGKQAINAVPANG  
TAKAAVDTEAEKAKAAIDKATDQAGVDSAKAAGKQAIENVPTTATFSKDAKQEIATAANA...KKS AIDGQAGLT  
SEKAAKAAVDTEAEKAKAAIDKATDQAGVDSAKAAGKQAIENVPTTATFSKDAKQEIATAANA...KKS AIDGQAGLT  
KEEKAAKAAVDTEAEKAKQEI D K R A T D Q A G I D K A K N D G L T A I E N V P T T A T F S K D A K Q E I T A A N K K K A A T D  
K A T D Q A G V D S A K V A G K K V I E N V P T T A T F S K D A K Q E I T A A N A E A . . . . K K S A I D G Q A G L T

smi\_0979

(661)

LQKQAKLEVDKAKKLTALLEGTPNATKEEKDAAKQAAQDAATKANQAI DAATDNAGVATAQTDGIAAIEAVTPTV  
AVKAAKAEVAKKLAEKLTALLEGTPNATKEEKDAAKQAAQDAATKANQAI DAATDNAGVATAQTDGIAAIEAVTPTV  
AVKAAKAEVAKKLAEKLTALLEGTPNATKEEKDAAKQAAQDAATKANQAI DAATDNAGVATAQTDGIAAIEAVTPTV  
AVKAAKAEVAKKLAEKLTALLEGTPNATKEEKDAAKQAAQDAATKANQAI DAATDNAGVATAQTDGIAAIEAVTPTV  
AVKAAKAEVAKKLAEKLTALLEGTPNATKEEKDAAKQAAQDAATKANQAI DAATDNAGVATAQTDGIAAIEAVTPTV  
AVKAAKAEVAKKLAEKLTALLEGTPNATKEEKDAAKQAAQDAATKANQAI DAATDNAGVATAQTDGIAAIEAVTPTV

smi\_1002

(2512)

IYRKLGSYVVVEGITTFFADADLNPKFPYNATFADPTKEGTFTIEKPVV.PIYPGTTTYPGPNKELTTPKDPNDPTKGYEVPDLFTDPTENTTITTV  
IFRKLGSYVEVIEPVGTVPTGTDLTPKPYENPTNEDPTREGTPTIETPV.PIYPGTTTYPGPNKELTTPKDPNDPTKGYEVPDLFTDPTENTTITTV  
DSVNVVYTLGKXVFKVPPGFE.VPKVEKQYENDPTDPTKPGPTTIVPIYPGTTTYPGPNKELTTPKDPNDPTKGYEVPDLFTDPTENTTITTV  
EPTDTPYENVGEPKXVVPSPTKQDFQDPNSPKVPVIEPIPGTTPVVPKDTKPISPDNPIVELTTPVDPNDPTKGYEVPDLFTDPTENTTITTV

ETIKDINEVTIYDKLGSWIRNIP.GTPTNFIYENDPKDTQPGGDKPKVYVPGFI PVDPEGGQLKPKVPDPNDPKGYEVEVPGDPTKDTPIINXI PKDPTPN

smi\_ 1064

(1160)

VVYTKLGSWVFKVPGVETPTPLPYPNHPDPTTKPGDPTDNTPNVPIPVYGYTPKIGBTPLEVDPNPENPKVPPINPTPGEDTPIEYSKDPQKAVVKVFNNTTGTETEVELPEEKVELSGKTGERIPADSVTAKTAD  
VVYKLGSWLPKVPGVETPTPLPYPNHPDPTTKPGDPMFNTPNVPIPVYGYTPKIGBTPLEVDPNPENPKVPPINPTPGEDTPIEYSKDPQKAVVKVFNNTTGTETEVELPEEKVELSGKTGERIPADSVTAKTAD

smi\_ 1306

(920)

KOPALD VNTAAATEKIAAINTPNAIDEKAAAIAKVNADKEKALTAI.....NDANVTTKAELDKAKEAGTTAAGDNPVYAK  
KAAAKADVEAARQAKADAINADKNLTQAEKDAALAKVNRKAEDATKAI.....DAATTDAAVDTAKGTGVTEIGKVNPFVA  
KONAKDAIGNALTAKNOEIDDRKDLTQAEKDAKAEAKKLADAEITKVNAPDPAETAEAAAAAQKLVNDAEDKGVADVTSVYPIA  
KEEAKVADELAKKEKELDDRKDLTTEKAAAKKEAKDLAKKATDAINAZQPAIADTSKATAAQQAVDTAKTTGVAEVKAVNPEAVK  
KNVAKKAIEDALTAARNNAIDARDLTPQOKTAAKEAAKADAAKDAI.....DKATTDADVDQAKTTDGETAVANVTPVA  
KKPAQOIAKALEDNAEIDKRTDLTEEKATAKKEAKDKADAOLAEIIAKQPDVADTPEAAQTQATAVAAKKTGVDEVTA VNF TAVT  
KPEAKKAI DAKLAEQKLTJESTPDAITDEKKVAADAALAAKAEI.....DKAGTDADVKALEDEAKAEIEKSLPLVED  
KPNARKAI DEEATAKKAIDSRTDLTP

(1601)

DADGNIIVTTPDGHQETITPEQVVKTSDTANEPKAGNDVVKPANKVWVADPAKLTDAEKEKIIKAAVEAVNPNNSVTV  
DEKGNKAVSTPDGQCVI PVDEIVRFAEDTKKPNAGNDINTPSDKTVVANPEALTPPEEKKAIEDKVKAVNPGATVVV  
DDKGNATVTTPSGKTAVI PAADLTKTAEAAAKPNAGDDVVKPASKTVVANPEALTPPEEKKAIEDKVKAVNPGATVVV  
DDKGNATVTTPSGKTAVI PAADLTKTAEAAAKPNAGDDVVKPASKTVVANPEALTPPEEKKAIEDKVKAVNPGATVVV  
DDKGNATVTTPSGKTAVI PAADLTKTAEAAAKPNAGDDVITTPASKTVVANPEALTPPEEKKAIEDKVKAVNPGATVVV  
DDKGNATVTTPSGKTAVI PAADLTKTAEAAAKPNAGNDINTPAVKTAVAKKDALTDSEKFAVKTAVEAVNPGAKVVV  
DDKGNATVTTKDGKTAVI PASQIVIPTEKLDLSEQNGVNI PATRLLVADKNNLTPPEETAKIKVAVEAVNPGSTVVV  
DEKGNATVTTVDGKTATI SAEQIVKDEADVATKNNGENLNLDFEKQLVADLDNLTDADKAGAKAKIIMANPDAEVI

smi\_ 1317

(692)

PKVEA  
PKVEA  
PKVEA  
PKVEA  
PKVEA

smi\_ 1398

(1457)

KVEI PTKPVAPVKPVDPTKAVAPVKPVI PAKPVVTI  
KPVTPTKPVVT IKPVTPTKPVASI KPVTFAKPVVTV  
KPVTPAKPVVT IKPVTPTKPVVTVKPVTFAKPVVI  
KPVTPTKPVVT IKPVI PAKPVVTLNPVI PTKPVSQV

>smi\_1531

(1301)

KGDKGKGEQLQGRDGDGAQGLPGRDGRDGAAGRDGRDGRDGDVLDGKVNPEANQKDGDKYVNTETGDFVYKNNGNWDKEGNI  
KGPKGDKDQGLQGRDGDGAQGLPGRDGRDGAAGRDGRDGRDGDVLDGKVNPEANQKDGDKYVNTETGDFVYKNNGNWDKEGNI  
KGPKGDKGAEAGAQGLPGRDGRDGAAGRDGRDGRDGDVLDGKVNPEANQKDGDKYVNTETGDFVYKNNGNWDKEGNI  
KGPKGDKDQGLQGRDGDGAQGLPGRDGRDGAAGRDGRDGRDGDVLDGKVNPEANQKDGDKYVNTETGDFVYKNNGNWDKEGNI  
KGPKGDKDQGLQGRDGDGAQGLPGRDGRDGAAGRDGRDGRDGDVLDGKVNPEANQKDGDKYVNTETGDFVYKNNGNWDKEGNI  
KGPKGDKDQGLQGRDGDGAQGLPGRDGRDGAAGRDGRDGRDGDVLDGKVNPEANQKDGDKYVNTETGDFVYKNNGNWDKEGNI  
KGPKGDKDQGLQGRDGDGAQGLPGRDGRDGAAGRDGRDGRDGDVLDGKVNPEANQKDGDKYVNTETGDFVYKNNGNWDKEGNI

>smi\_1662

(999)

SASTSASKSAS TSASQ (>18)

SASTSASESAS TSASA (>14)
